# Supplementary material for: Structure of Escherichia coli respiratory complex I reconstituted into lipid nanodiscs reveals an uncoupled conformation
Source: eLife journal article supplement (doi:10.7554/elife.68710), 2021-07-26
Supplement: supp [file elife-68710-supp-v1.zip]

**A**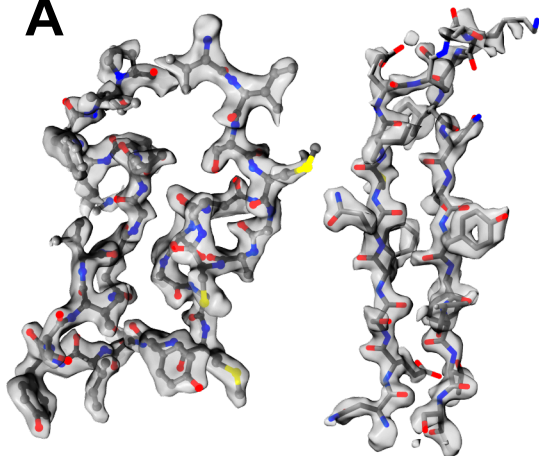

NuoB: 123-150

NuoCD: 527-546  
β-sheet**B**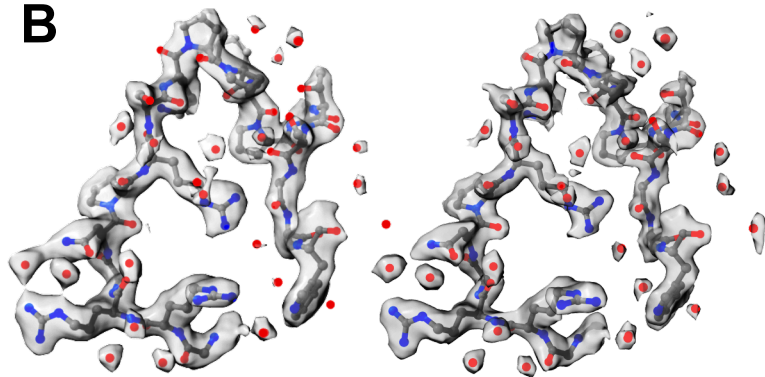

RELION 3.1

PHENIX ResolveCryoEM  
NuoF: 192-210, H<sub>2</sub>O**C**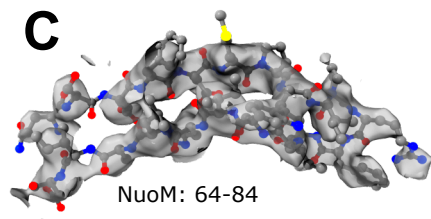

NuoM: 64-84

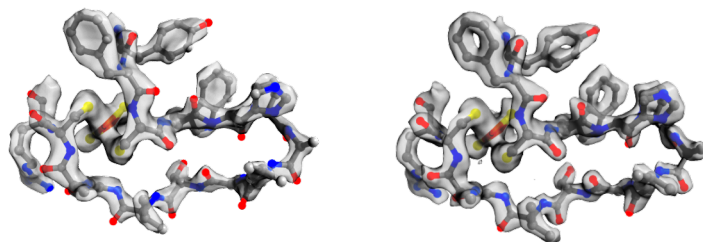

RELION 3.1

PHENIX ResolveCryoEM  
NuoG: 32-46**D**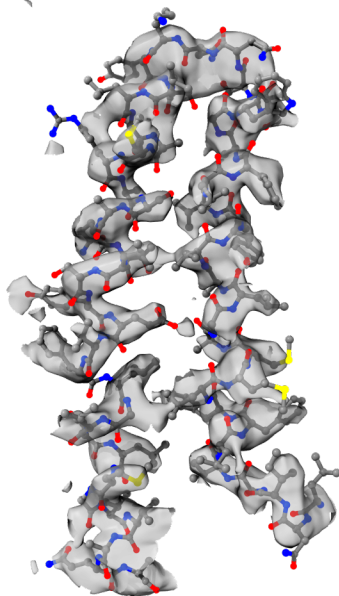NuoH: 112-171  
TM3-4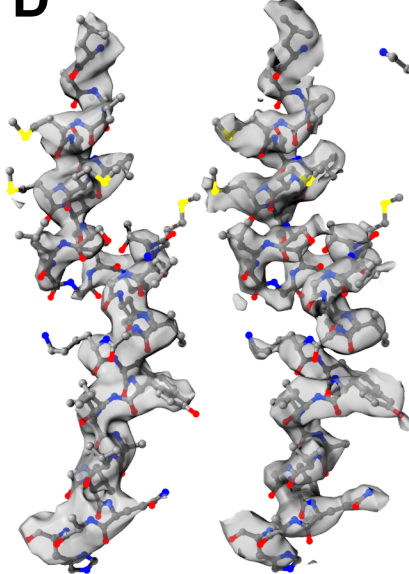RELION 3.1 PHENIX ResolveCryoEM  
NuoN: 372-406  
TM12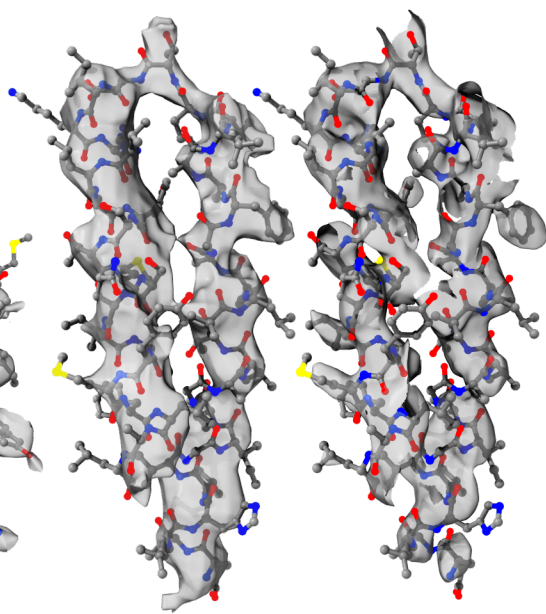RELION 3.1 PHENIX ResolveCryoEM  
NuoL: 278-323  
TM9-10
