# Supplementary material for: Structure of Escherichia coli respiratory complex I reconstituted into lipid nanodiscs reveals an uncoupled conformation
Source: eLife journal article supplement (doi:10.7554/elife.68710), 2021-07-26
Supplement: supp [file elife-68710-supp-v1.zip]

**A**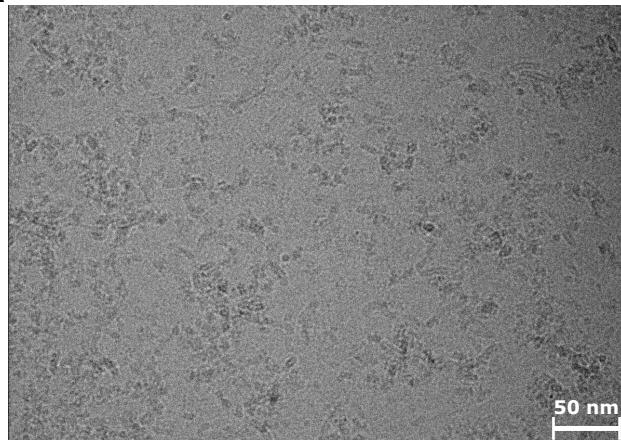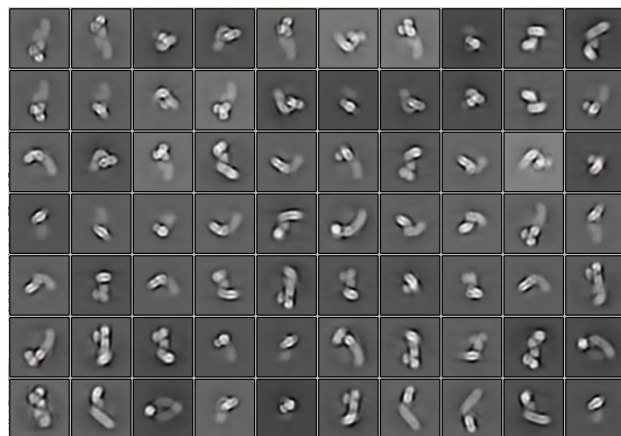**C**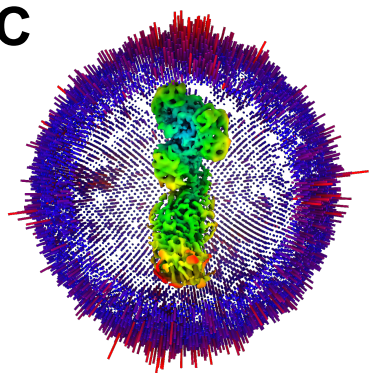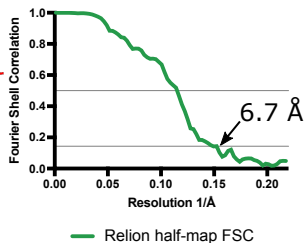**B**

crYOLO: 1,469,948 particles

cryoSPARC

2D classification

792,120 particles

Refine3D  
2D classification  
Refine3D  
peripheral arm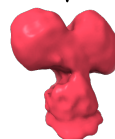778,159 p.  
11 ÅClass3D  
peripheral arm  
local alignments  
12 classes, T=6  
Refine3D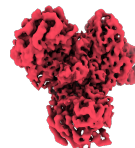82,433 p.  
4.3 ÅClass3D:  
full complex  
no alignment  
15 classes, T=15  
Refine3D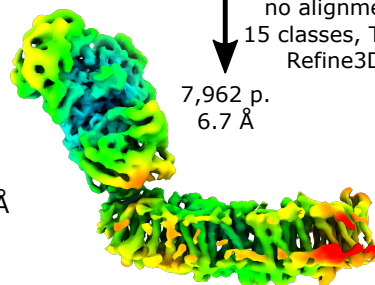7,962 p.  
6.7 Å

4 5.5 7 8.5 10
