# Supplementary figures and images for: Structure of Escherichia coli respiratory complex I reconstituted into lipid nanodiscs reveals an uncoupled conformation
Source: eLife journal article supplement (doi:10.7554/elife.68710), 2021-07-26

**Class 1****Class 2****Class 3****Class 4****Class 5**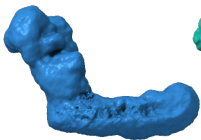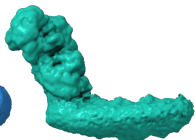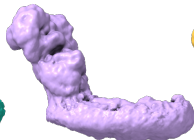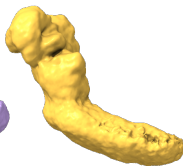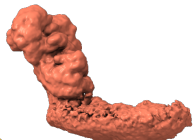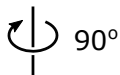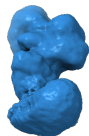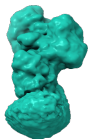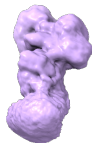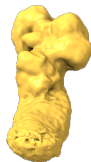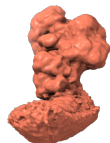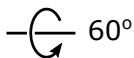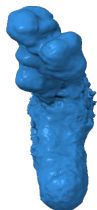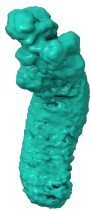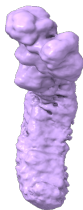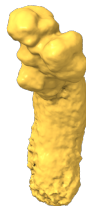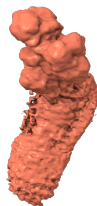

Supplement: supp [file elife-68710-supp-v1.zip]

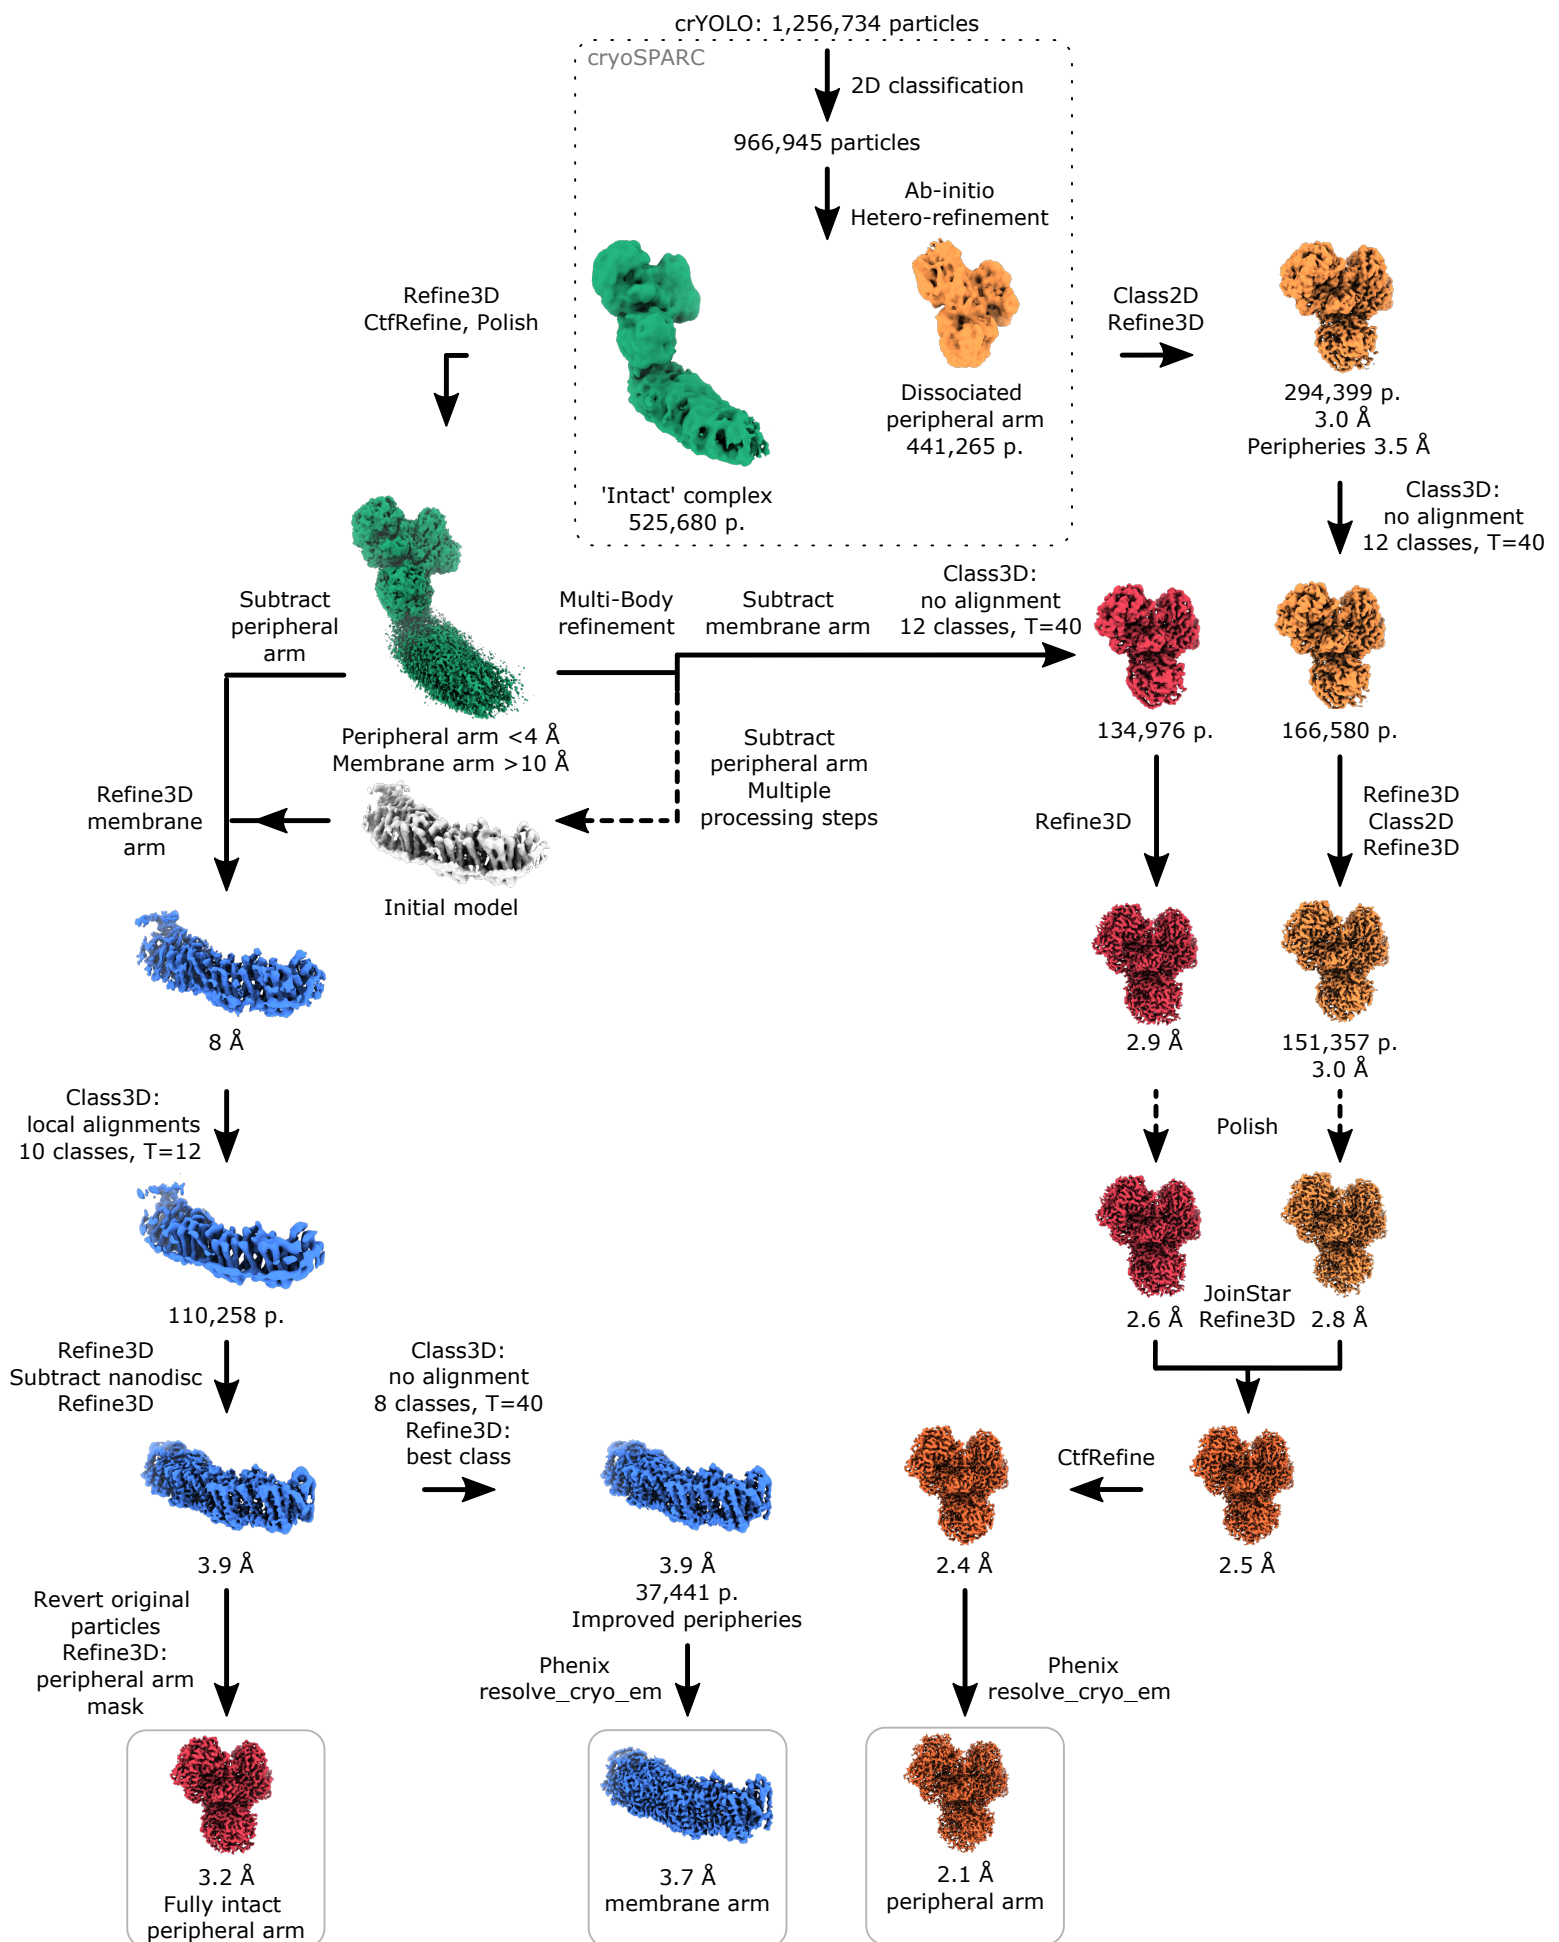

Supplement: supp [file elife-68710-supp-v1.zip]

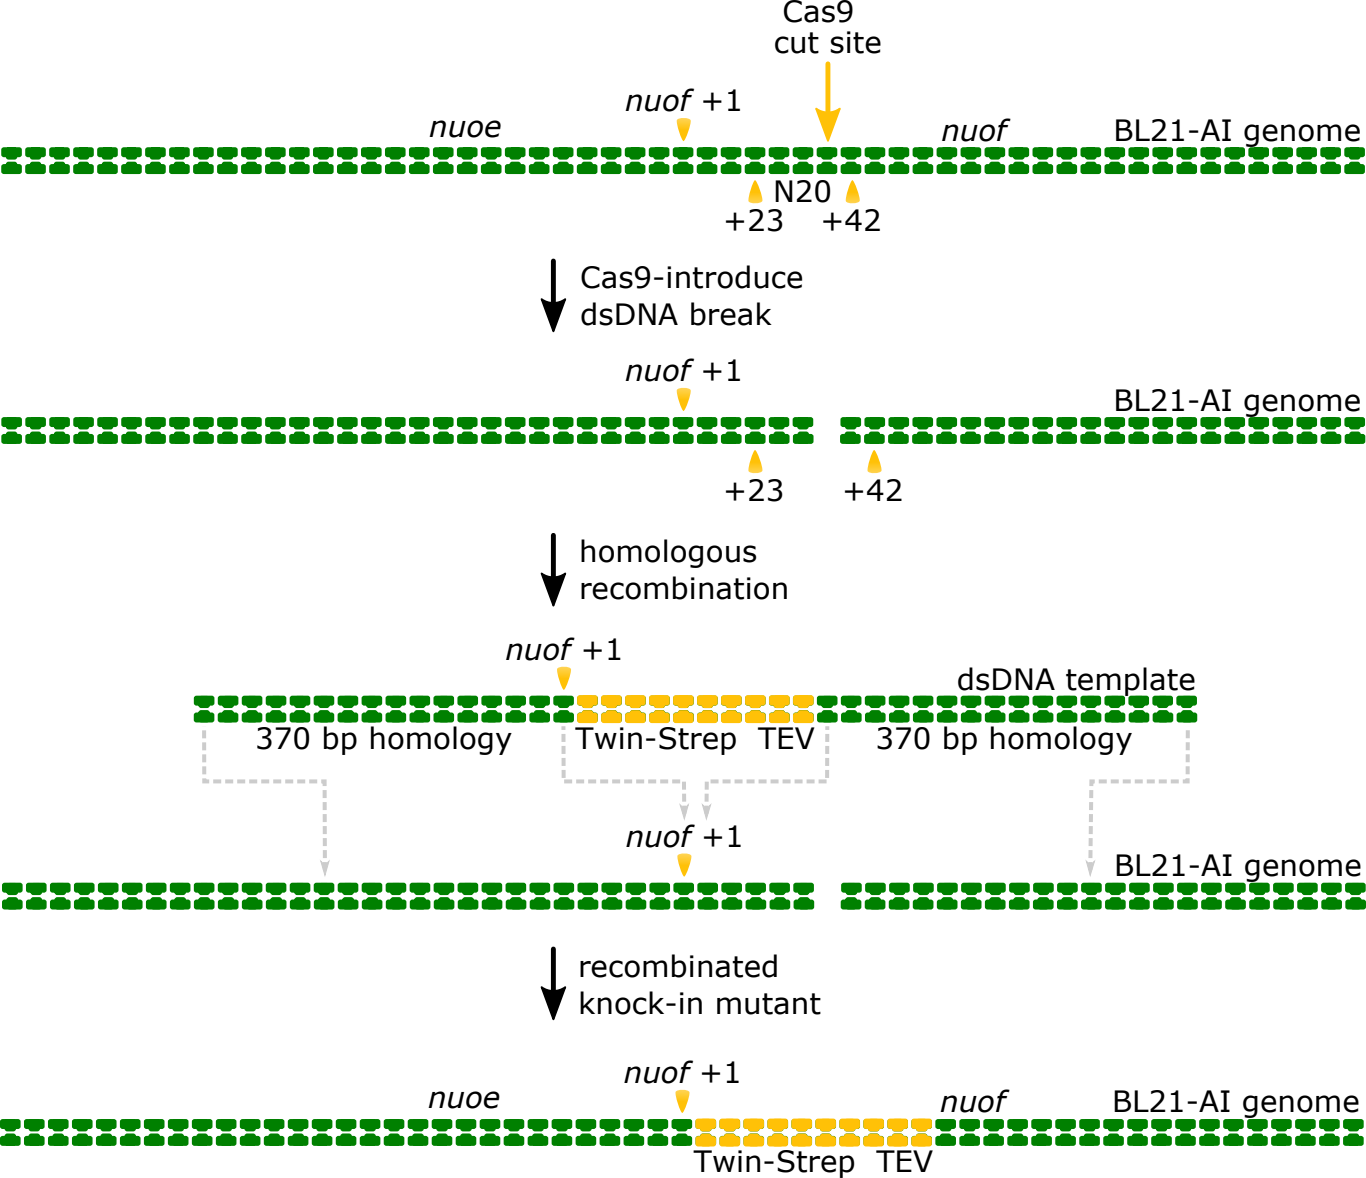

Supplement: supp [file elife-68710-supp-v1.zip]

**A**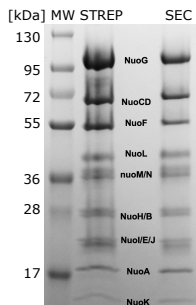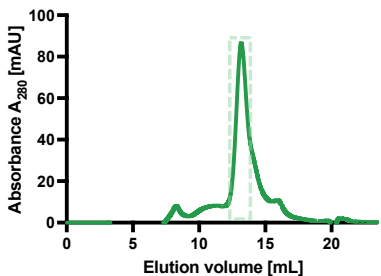**B**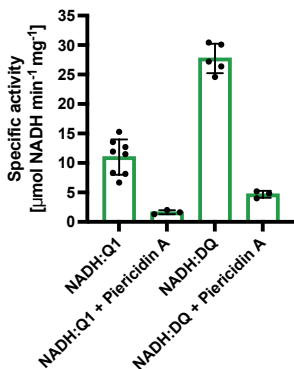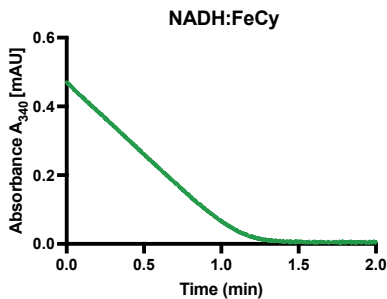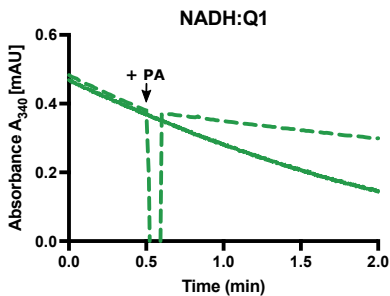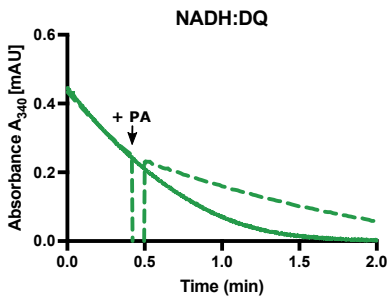

Supplement: supp [file elife-68710-supp-v1.zip]

**A**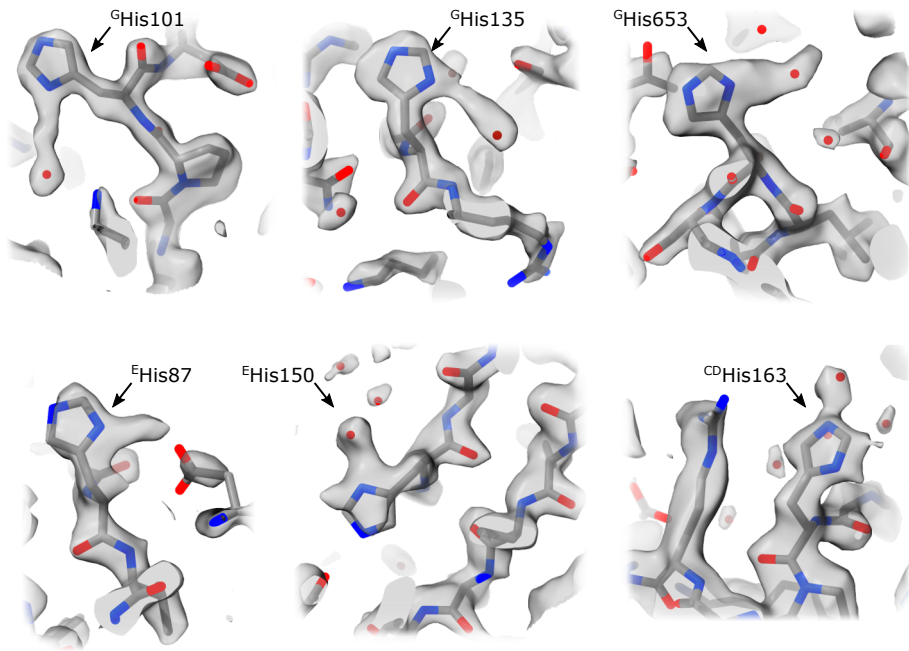

His modifications

**B**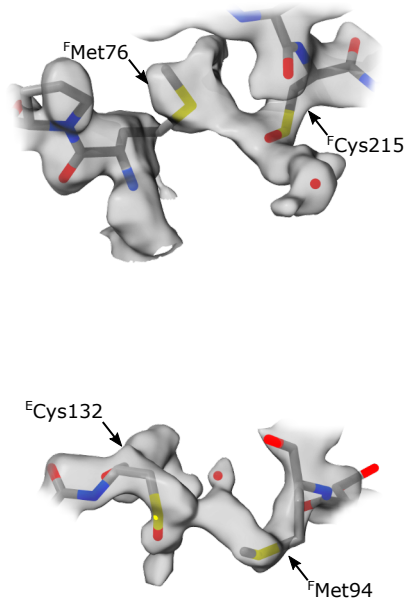

Cys-Met connections

Supplement: supp [file elife-68710-supp-v1.zip]

**Class 1**  
10 Å

**Class 2**  
12 Å

**Class 3**  
9 Å

**Class 4**  
13 Å

**Class 5**  
11 Å

**Class 6**  
11 Å

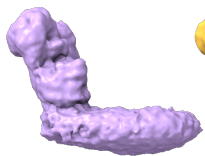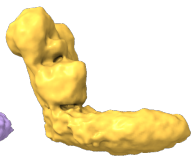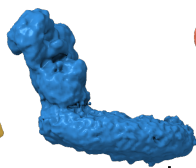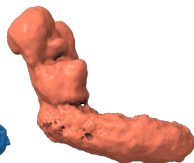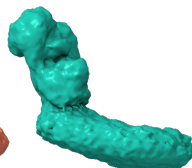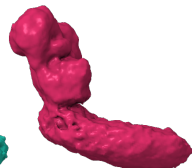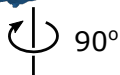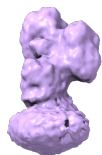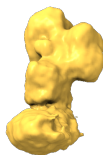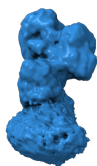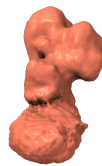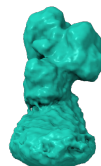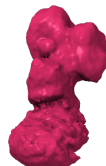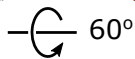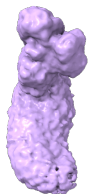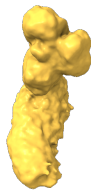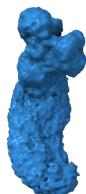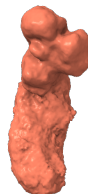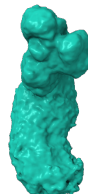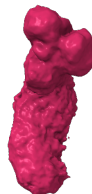

Supplement: supp [file elife-68710-supp-v1.zip]

**A**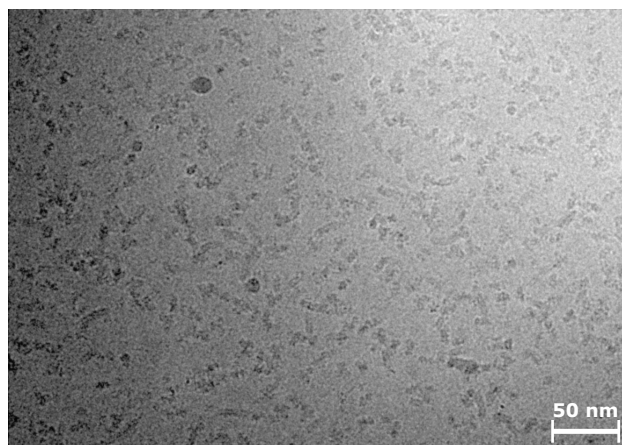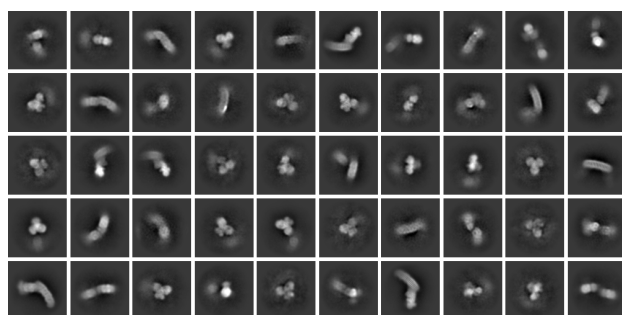**B**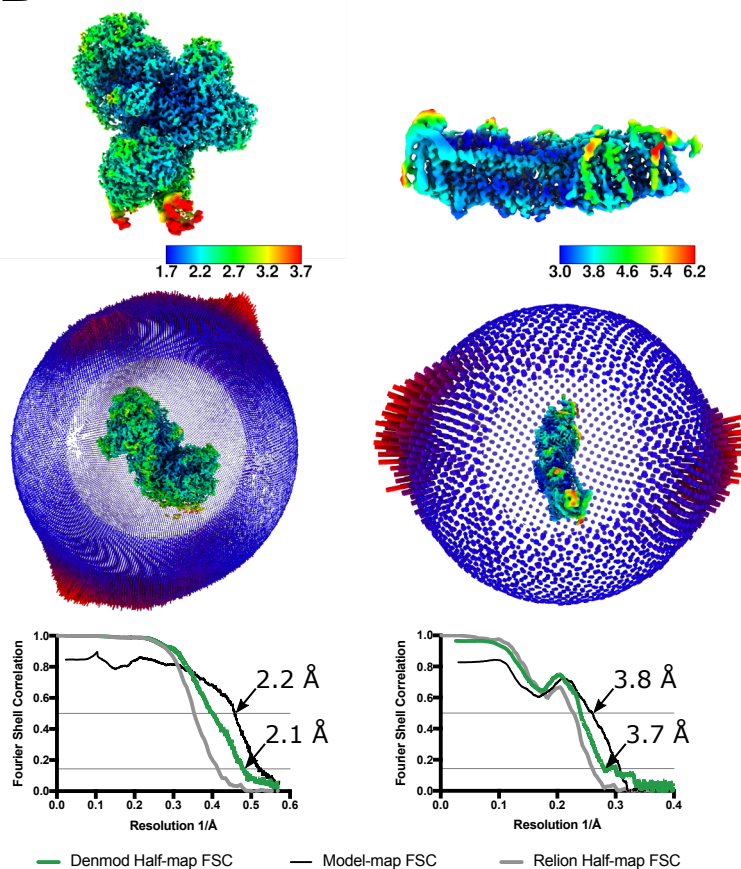**C**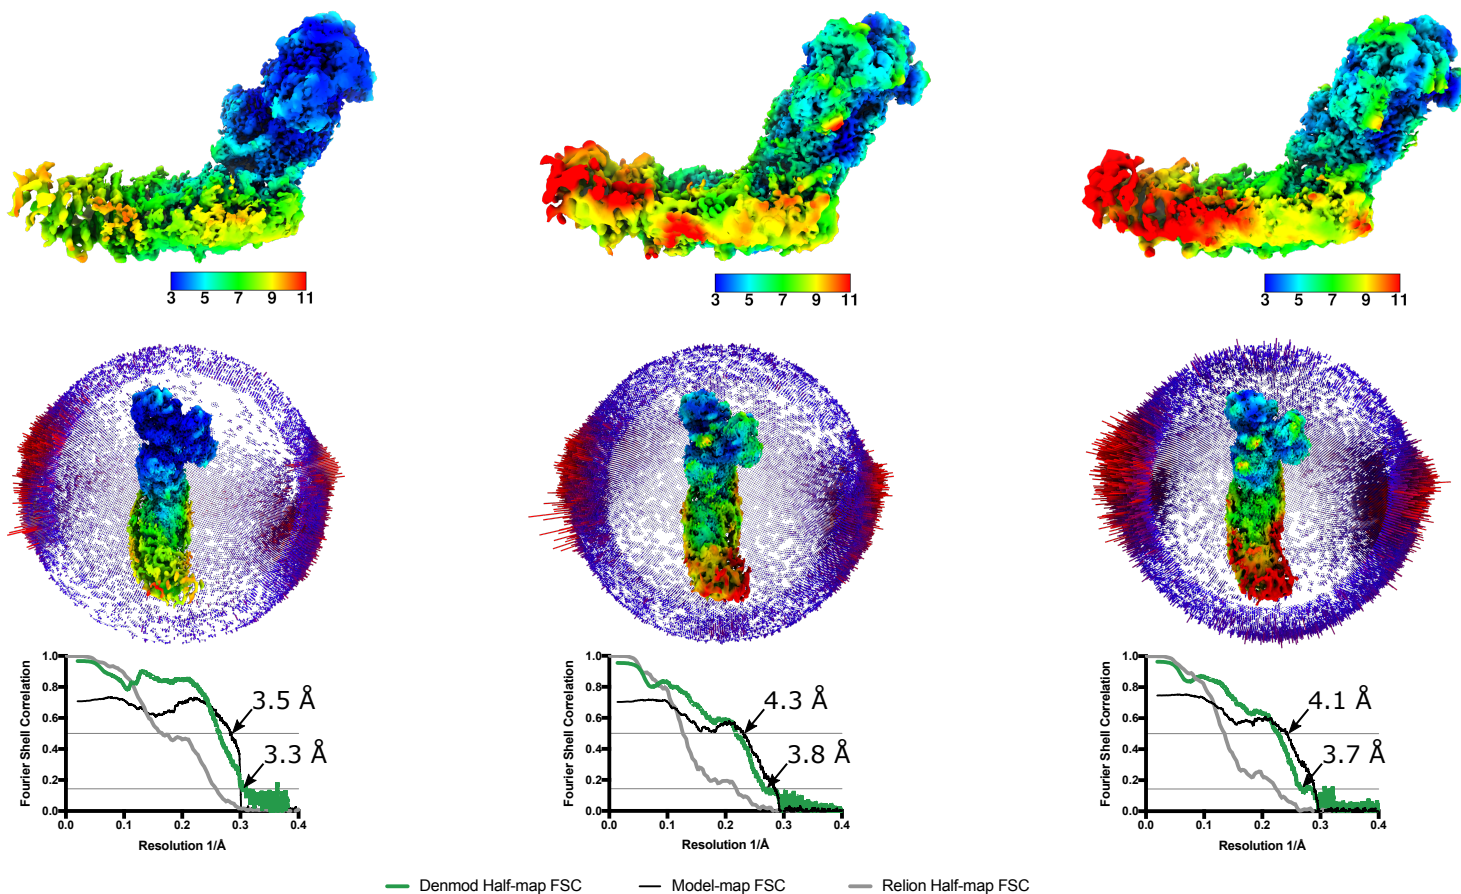

Conformation 1

Conformation 2

Conformation 3

Supplement: supp [file elife-68710-supp-v1.zip]

**A**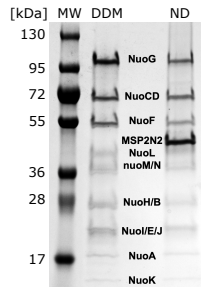**B**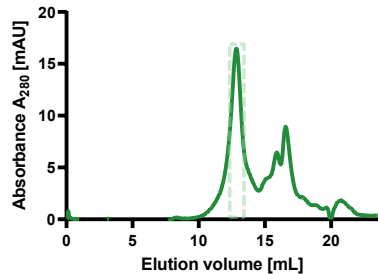**C**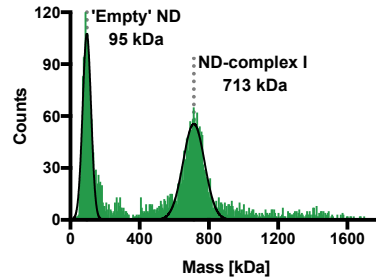

| Peak         | No. of events | Molar fraction |
|--------------|---------------|----------------|
| 'Empty' ND   | 6563          | 0.31           |
| ND-complex I | 8583          | 0.40           |
| Background   | 6289          | 0.29           |
| Total events | 21435         | 1              |

**D**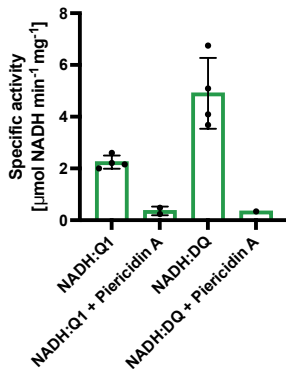**E**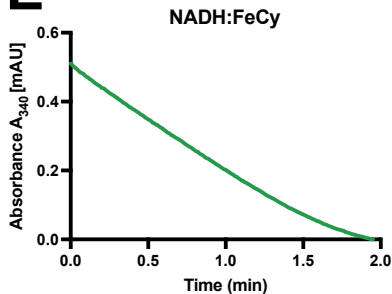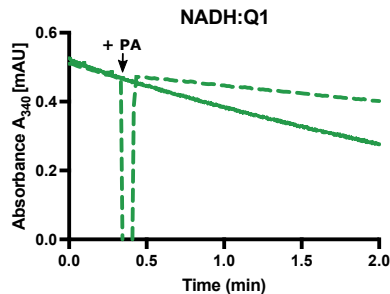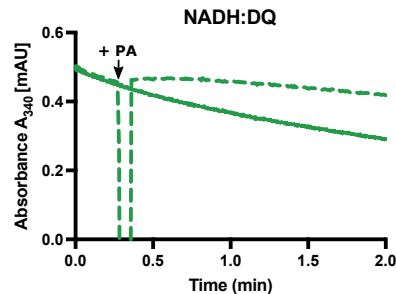

Supplement: supp [file elife-68710-supp-v1.zip]
